# Supplementary material for: Prevention and treatment of autoimmune diseases with plant virus nanoparticles
Source: PubMed Central journal article supplement — Sci Adv. 2020 May 6;6(19):eaaz0295. doi: 10.1126/sciadv.aaz0295 (PMC7202875; doi:10.1126/sciadv.aaz0295), 2020-05-06
Supplement: aaz0295_SM.pdf [file aaz0295_SM.pdf]

## Supplementary Materials for

### **Prevention and treatment of autoimmune diseases with plant virus nanoparticles**

Roberta Zampieri, Annalisa Brozzetti, Eva Pericolini, Elena Bartoloni, Elena Gabrielli, Elena Roselletti, George Lomonosoff, Yulia Meshcheriakova, Luca Santi, Francesca Imperatori, Matilde Merlin, Elisa Tinazzi, Francesco Dotta, Laura Nigi, Guido Sebastiani, Mario Pezzotti, Alberto Falorni, Linda Avesani\*

\*Corresponding author. Email: [linda.avesani@univr.it](mailto:linda.avesani@univr.it)

Published 6 May 2020, *Sci. Adv.* **6**, eaaz0295 (2020)

DOI: [10.1126/sciadv.aaz0295](https://doi.org/10.1126/sciadv.aaz0295)

#### **This PDF file includes:**

Figs. S1 and S2

## Supplementary Materials

**S1 Statistical comparison between the survival curves of NOD mice treated groups.** In the table the p-values resulting from the pairwise comparison of the survival

**Supplementary Figure 1**

| Comparison between |              | p     |
|--------------------|--------------|-------|
| p524 15 aa         | p524 18 aa   | 0.364 |
|                    | CPMV wt      | 0.551 |
|                    | CPMV p524 1t | 0.227 |
|                    | CPMV p524 2t | 0.008 |
| p524 18 aa         | CPMV wt      | 0.109 |
|                    | CPMV p524 1t | 0.052 |
|                    | CPMV p524 2t | 0,001 |
| CPMV wt            | CPMV p524 1t | 0.398 |
|                    | CPMV p524 2t | 0.04  |
| CPMV p524 1t       | CPMV p524 2t | 0.294 |

**S2 Parameters used to assess arthritis in the animal model.**

Supplementary Figure 2

| <b>Parameter 1*</b>                    |              |
|----------------------------------------|--------------|
| <i>Caliper measurement</i>             | <i>Score</i> |
| 2,0-2,2                                | 0            |
| 2,3-2,4                                | 1            |
| 2,5-2,6                                | 2            |
| 2,7-2,8                                | 3            |
| >2,9                                   | 4            |
|                                        |              |
| <b>Parameter 2</b>                     |              |
| <i>Erythema</i>                        | <i>Score</i> |
| no                                     | 0            |
| weak erythema on at least two legs     | 1            |
| moderate erythema on at least two legs | 2            |
| strong erythema on at least two legs   | 3            |
| strong erythema on more then two legs  | 4            |
|                                        |              |
| <b>Parameter 3</b>                     |              |
| <i>Swelling of the fingers</i>         | <i>Score</i> |
| no fingers swollen                     | 0            |
| one finger swollen                     | 1            |
| two fingers swollen                    | 2            |
| three fingers swollen                  | 3            |
| four or more fingers swollen           | 4            |

\* Two scores have been assigned for the two hind ankle and foots and then the values obtained were mediated.
